# Supplementary material
Source: PubMed Central journal article supplement (PMC1817642)
Supplement: 7601597s1.pdf [file 7601597s1.pdf]

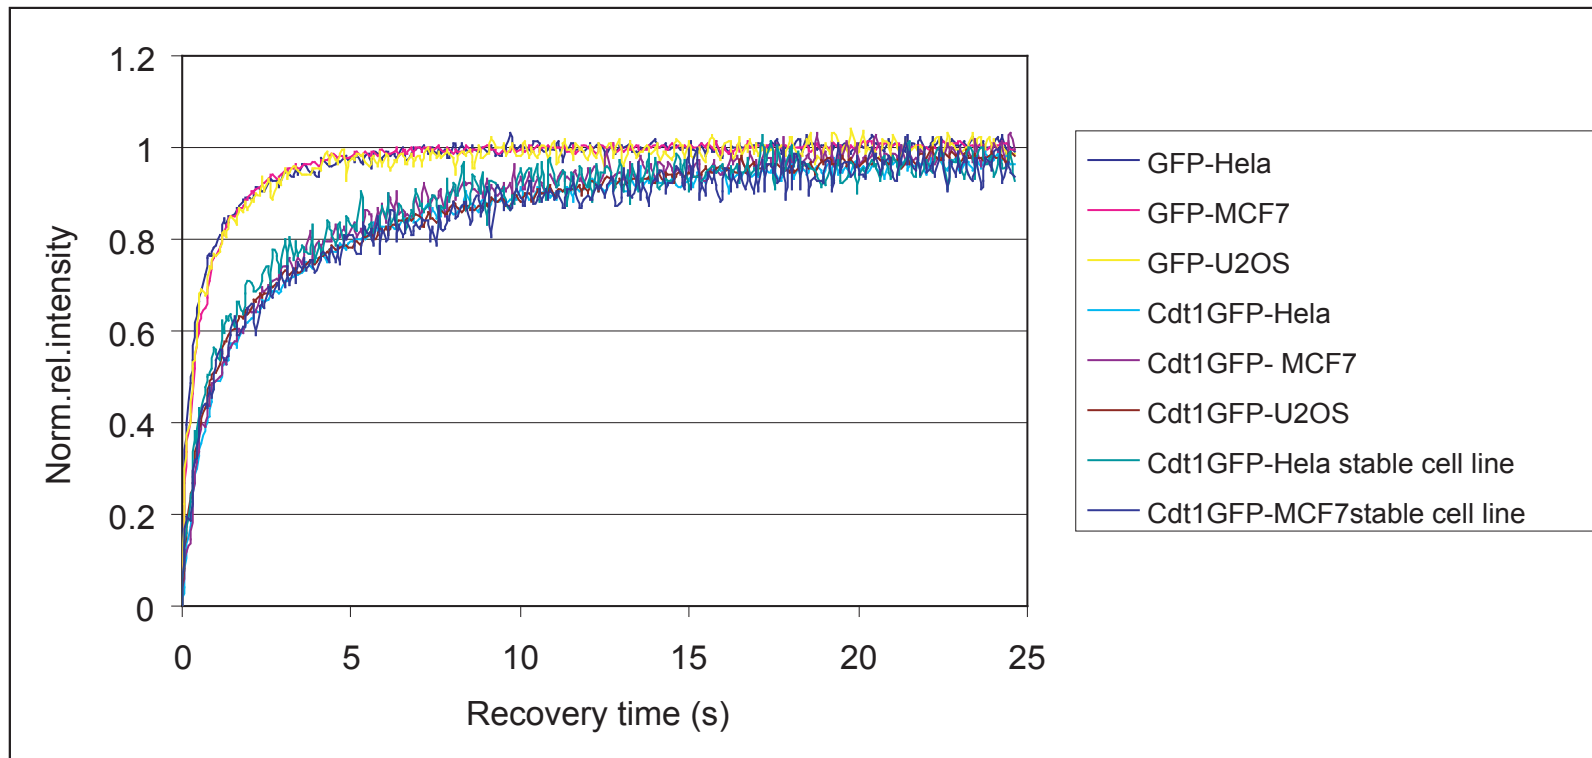

**Supplementary Figure S1:** Cdt1GFP shows similar dynamic chromatin association in different cell lines. Shown are the fluorescence recovery curves over time of Cdt1GFP and GFPnls in various cell lines. Cdt1GFP and GFPnls were transiently transfected in MCF7, HeLa and U2OS cells while Cdt1GFP recovery was also recorded in MCF7 and HeLa stable cell lines.
