# Supplementary material
Source: PubMed Central journal article supplement (PMC1817642)
Supplement: 7601597s2.pdf [file 7601597s2.pdf]

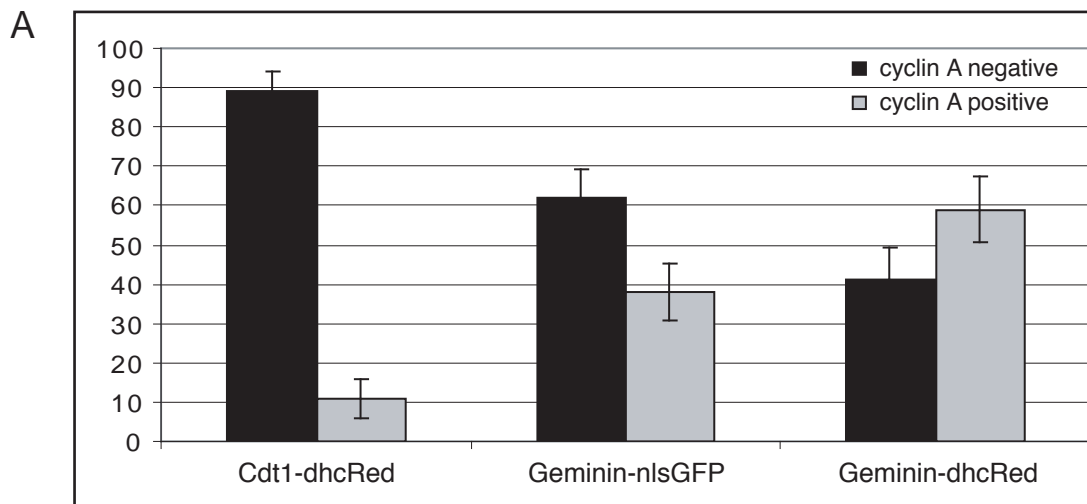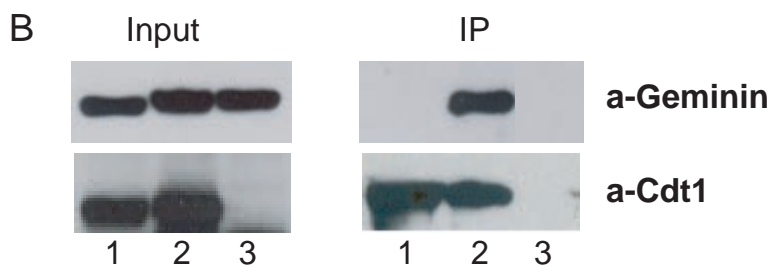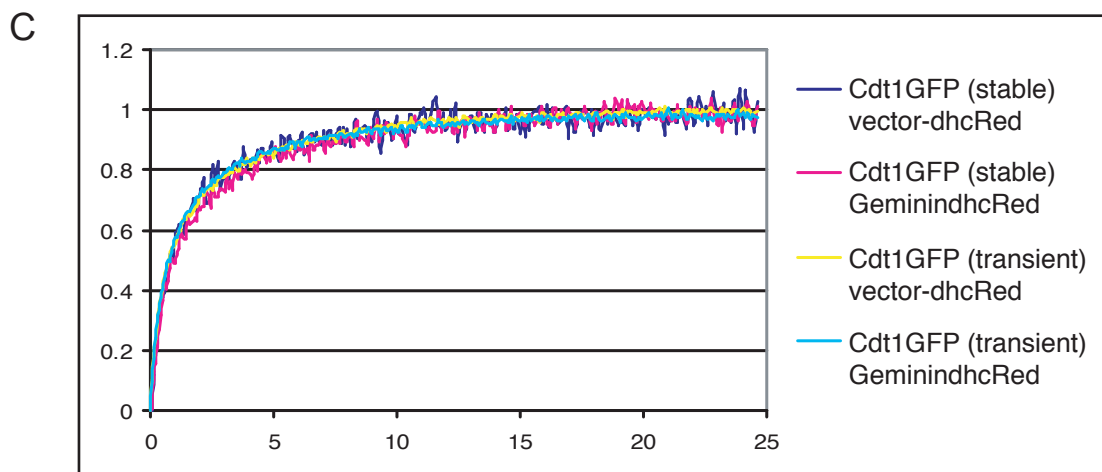

**Supplementary Figure S2: Analysis of Cdt1-Geminin interactions. (A)** Cell cycle expression of Cdt1 and Geminin tagged proteins. MCF7 cells transiently transfected with either Cdt1dhcRed, Geminin-nlsGFP or GeminindhcRed were subjected to indirect immunofluorescence with anti-cyclin A specific antibodies (as an S/G2 phase marker). The percentage of cells positive or negative for cyclin A is shown in the diagram. While Cdt1dhcRed shows G1 specific expression, GemininnlsGFP and GeminindhcRed are expressed in both G1 and S/G2. Data were acquired in 300 cells from 3 independent experiments. **(B)** Immunoprecipitation experiments were performed with a-GFP specific antibodies in MCF7 whole cell extracts transiently co-expressing (1) Cdt1GFP and Geminin $\Delta$ 90-120dhcRed, (2) Cdt1GFP and Geminin-dhcRed and (3) GFPnls and Geminin-dhcRed. Immunoprecipitates (IP) and 10% of input were blotted with a-Geminin and a-Cdt1 antibodies. **(C)** Comparison of FRAP experiments in cells co-expressing Cdt1GFP and GeminindhcRed or vector-dhcRed, in cells that express Cdt1GFP stably or transiently.
